# Supplementary material for: Ultra-Short Circulating Tumor DNA (usctDNA) in Plasma and Saliva of Non-Small Cell Lung Cancer (NSCLC) Patients
Source: PubMed Central journal article supplement (PMC7464208; doi:10.3390/cancers12082041), 2020-07-24
Supplement: cancers-12-02041-s001.pdf [file cancers-12-02041-s001.pdf]

## Supplementary Materials

# Ultra-Short Circulating Tumor DNA (usctDNA) in Plasma and Saliva of Non-Small Cell Lung Cancer (NSCLC) Patients

Feng Li <sup>1,†,\*</sup>, Fang Wei <sup>1,†</sup>, Wei-Lun Huang <sup>2</sup>, Chien-Chung Lin <sup>2</sup>, Liang Li <sup>1,3</sup>, Macy M. Shen <sup>1</sup>, Qingxiang Yan <sup>4</sup>, Wei Liao <sup>1</sup>, David Chia <sup>1</sup>, Michael Tu <sup>1</sup>, Jason H. Tang <sup>1</sup>, Ziding Feng <sup>4</sup>, Yong Kim <sup>1</sup>, Wu-Chou Su <sup>2,\*</sup> and David T.W. Wong <sup>1,\*</sup>

**Table S1.** The sequences of primers used for ddPCR assays in figure 3D and qPCR assay (figure 4B).

| Primer ID   | Sequence                  | Primer Pair | Amplicon Size (bp) |
|-------------|---------------------------|-------------|--------------------|
| L858 F1     | ACACCGCAGCATGTCAA         | F1+R1       | 55                 |
| L858 F2     | GGAACGTA CTGGTGA AAAACAC  | F1+R2       | 83                 |
| L858 F3     | TGGCAGCCAGGAACGTA         | F1+R3       | 105                |
| L858 F4     | AGGGCATGAACTACTTGGAG      | F1+R4       | 137                |
| L858 F5     | CCCATGATGATCTGTCCCTC      | F1+R5       | 184                |
| L858 R1     | CCGCACCCAGCAGTTTG         | F2+R1       | 72                 |
| L858 R2     | CCTCCTTCTGCATGGTATTCT     | F3+R1       | 81                 |
| L858 R3     | CTAAAGCCACCTCCTTACTTTG    | F4+R1       | 126                |
| L858 R4     | TGGTCCCTGGTGT CAGGA       | F5+R1       | 168                |
| L858 R5     | ATCCTCCCCTGCATGTGTTA      | CCRF+R6     | 62                 |
| L858 R6     | ATCTTTCTCTTCCGCACCC       | CCRF+CCRR   | 78                 |
| L858 CCR F* | GCAGCATGTCAAGATCACAGATT   | CCRF+R3     | 100                |
| L858 CCR R* | CCTCCTTCTGCATGGTATTCTTTCT | F4+R2       | 154                |
|             |                           | F5+R2       | 196                |
|             |                           | F5+R4       | 250                |
|             |                           | F5+R5       | 297                |

\* Primers from previous paper [1]

**Table S2.** The tissue genotyping information, ddPCR results and EFIRM test results of paired plasma and saliva samples from NSCLC patients.

| Sample ID | tissue genotyping | TNM      | Plasma Tests            |                   |                   |             | Saliva Tests            |                 |                  |             |
|-----------|-------------------|----------|-------------------------|-------------------|-------------------|-------------|-------------------------|-----------------|------------------|-------------|
|           |                   |          | ddPCR Exon 19-del assay | Exon 19-del EFIRM | ddPCR L858R assay | L858R EFIRM | ddPCR Exon 19-del assay | Exon19del EFIRM | ddPCR L858 assay | L858R EFIRM |
| UCLA-088  | EX19Del           | T4N3M1b  | 2                       | 246.8             | 0                 | 23.7        | 0                       | 1398.0          | 0                | 40.4        |
| UCLA-097  | EX19Del           | T3N3M1b  | 12                      | 215.3             | 0                 | 21.3        | 0                       | 837.4           | 0                | 65.1        |
| UCLA-099  | EX19Del           | T1bN3M1b | 2                       | 665.6             | 0                 | 24.9        | 2                       | 1684.4          | 0                | 45.5        |
| UCLA-100  | EX19Del           | T4N3M1b  | 4                       | 219.3             | 0                 | 21.9        | 0                       | 1675.0          | 0                | 36.8        |
| UCLA-103  | EX19Del           | T3N2M1b  | 30                      | 243.0             | 0                 | 18.6        | 0                       | 1282.7          | 0                | 59.8        |
| UCLA-091  | EX19Del           | T4N3M1b  | 0                       | 188.1             | 0                 | 22.3        | 0                       | 1296.0          | 0                | 77.1        |
| UCLA-082  | L858R             | T3N3M1b  | 0                       | 15.5              | 591               | 55.8        | 0                       | 158.2           | 76               | 223.1       |
| UCLA-101  | L858R             | T3N3M1b  | 0                       | 13.8              | 10                | 61.2        | 0                       | 32.1            | 0                | 145.7       |
| UCLA-111  | L858R             | T4N3M1b  | 0                       | 14.3              | 419               | 59.1        | 0                       | 34.9            | 0                | 174.9       |
| UCLA-137  | L858R             | TxNxM1a  | 0                       | 21.5              | 2                 | 116.0       | 0                       | 66.7            | 0                | 228.0       |
| UCLA-138  | L858R             | T3N3M1b  | 0                       | 15.7              | 6                 | 103.9       | 0                       | 50.9            | 0                | 244.3       |
| UCLA-143  | L858R             | T4N3M1b  | 0                       | 17.0              | 88                | 102.2       | 0                       | 44.4            | 0                | 175.3       |
| UCLA-152  | L858R             | T4N2M1b  | 0                       | 8.4               | 0                 | 88.1        | 0                       | 31.9            | 0                | 173.3       |

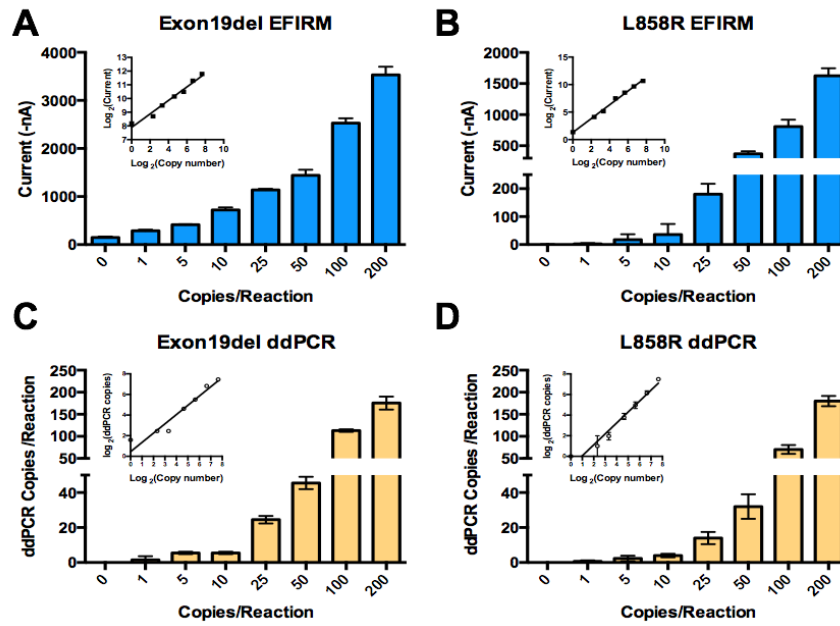

**Figure S1.** Comparison of the limit of detection (LOD) of EFIRM and ddPCR for detection of EGFR exon19del and L858R mutations. Mimic ctDNA samples were generated by shearing the gDNA from HCC827 cell (harboring ex19del) and H1975 cell (harboring L858R) to the final size of 140–200 bp. The total copy number of mutated DNA targets were determined using ddPCR assays. The serially diluted samples were used for relative LOD determination by EFIRM (A and B) and ddPCR (C and D). Both platforms showed a high degree of linearity (small panels). The LOD was determined based on the standard deviation of the response and the slope in the linear region.

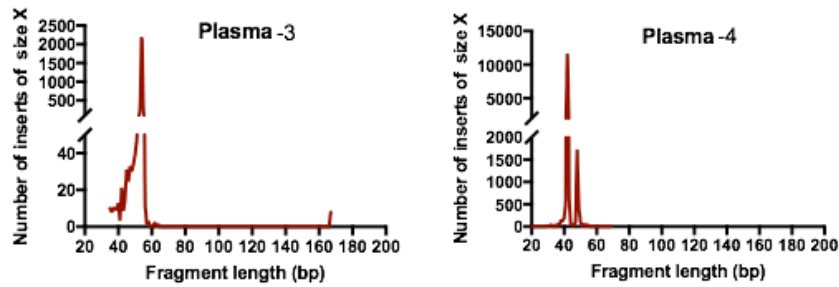

**Figure S2.** High-resolution size analysis for ctDNA harboring L858R in plasma samples using massively parallel sequencing.

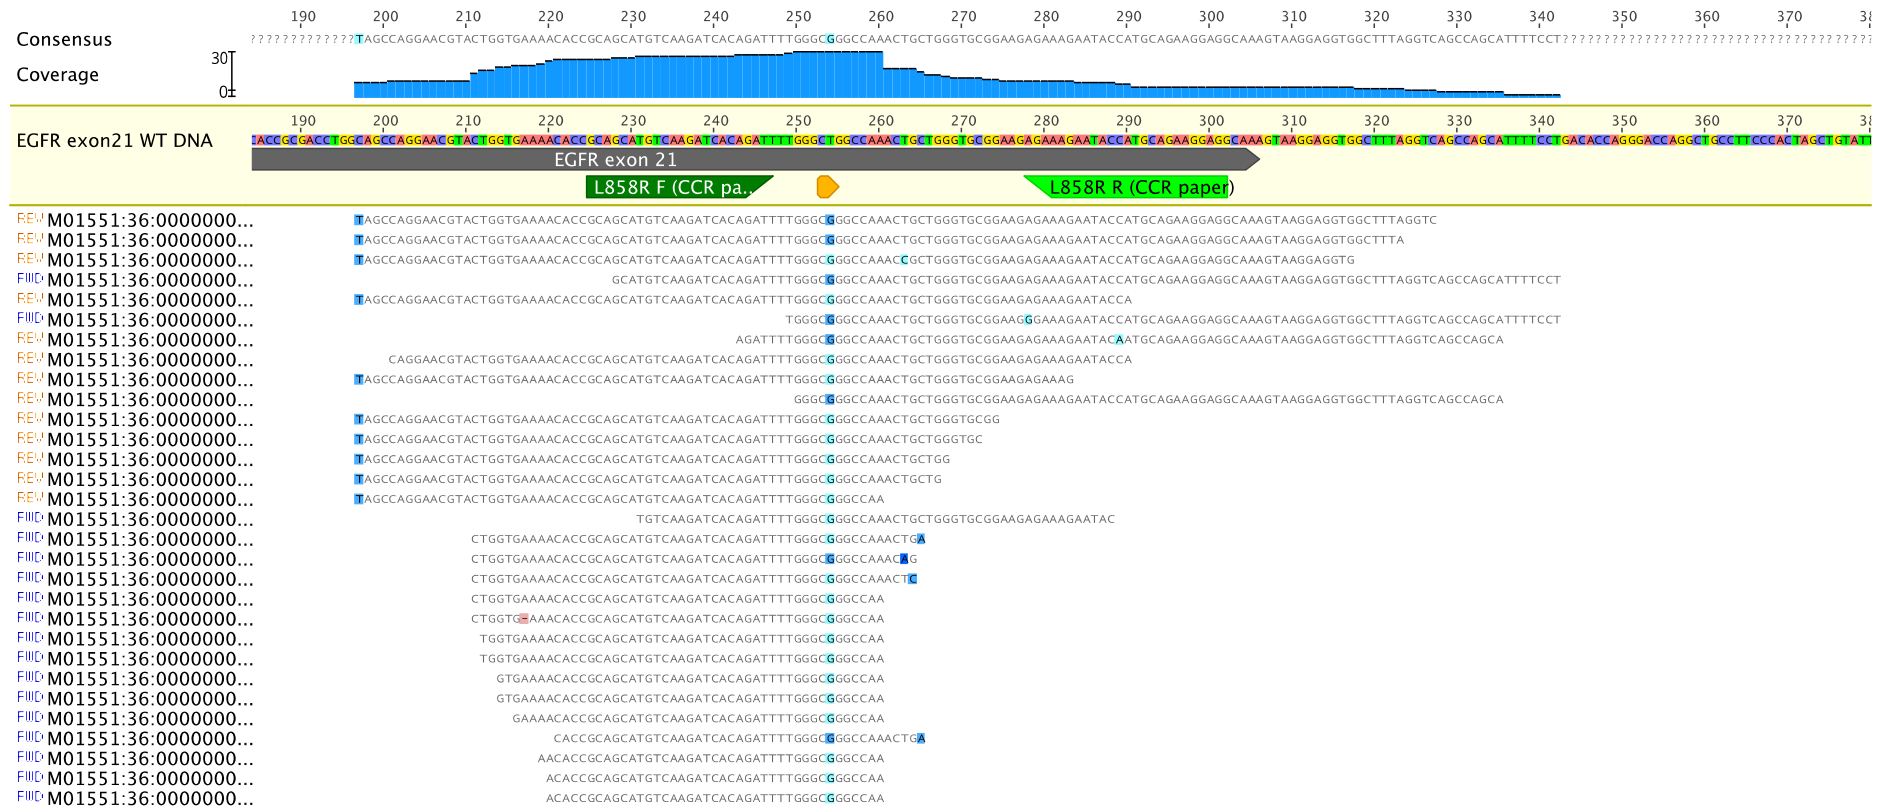

Figure S3. Mapping results of represented ctDNA with L858R mutation from plasma samples.

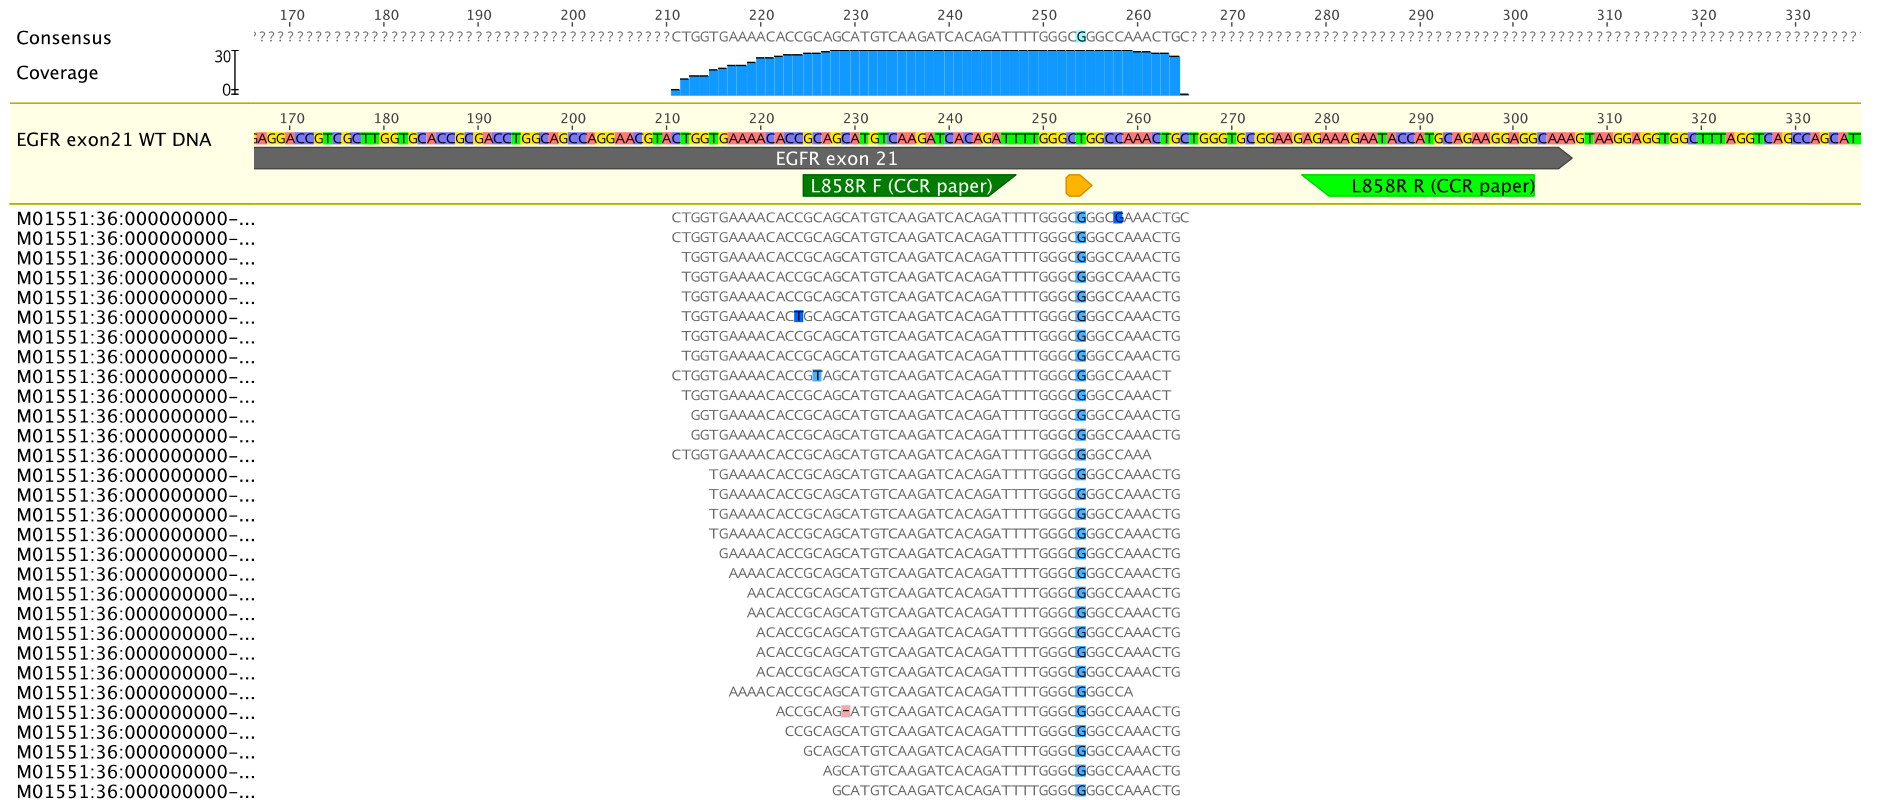

Figure S4. Mapping results of represented ctDNA with L858R mutation from saliva samples.

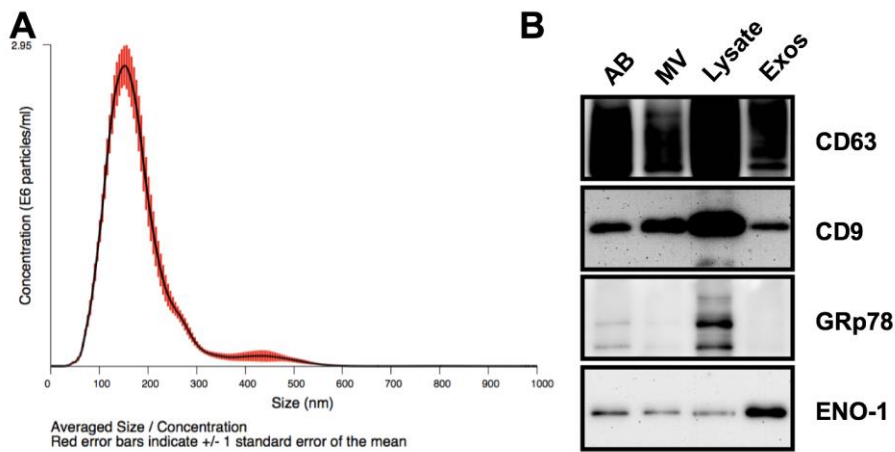

**Figure S5.** Quantification of exosomes isolated from the cell culture medium. **(A)** Verification of exosomes using Nanosight. **(B)** Characterization of HCC827 derived EVs by western blot analysis with the EV external surface markers (CD9 and CD63) as well as by internal markers (ENO-1) where the endoplasmic reticulum marker GRp78 served as a negative control. All original Western Blots figures can be seen in Figure S6

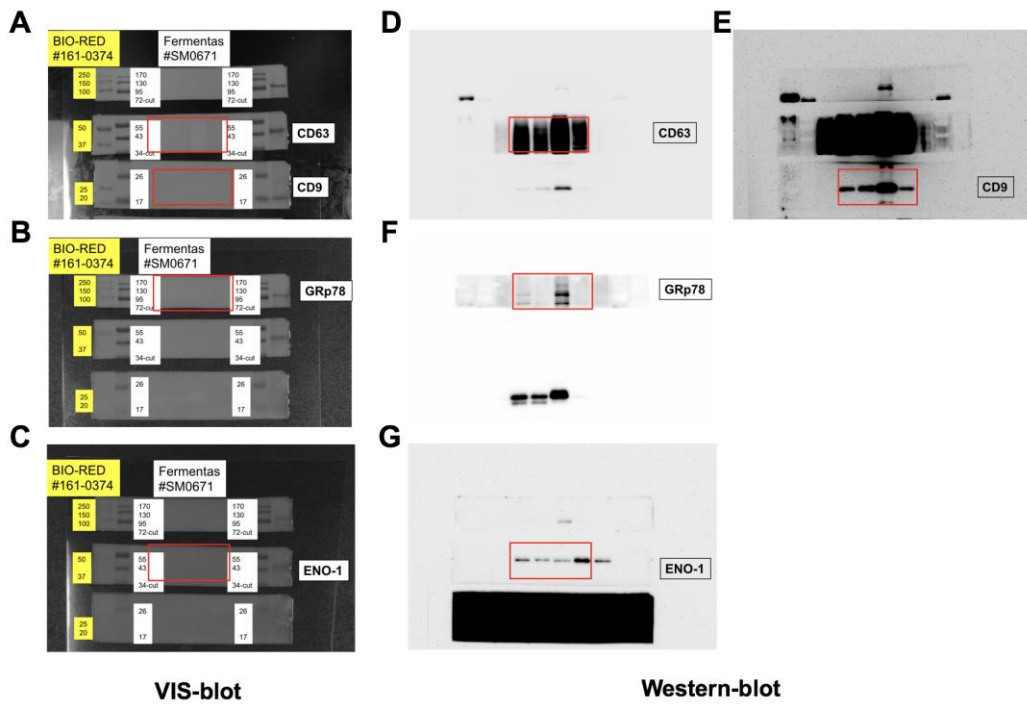

**Figure S6.** The original Western Blots images for figure S5B. The whole blot membrane was sliced for different antibody detection. The same membranes were used and re-probed with different antibodies after stripping to use the EV samples effectively. The whole blot images under visible light were listed on the left panel (A, B and C). Two different molecular weight markers were labeled on the blots. The right panel showed corresponding images after probing with different antibodies (D, E, F and G). The cropped regions for Figure S5B were identified with red frames.

## References

1. Pu, D.; Liang, H.; Wei, F.; Akin, D.; Feng, Z.; Yan, Q.; Li, Y.; Zhen, Y.; Xu, L.; Dong, G.; et al. Evaluation of a novel saliva-based epidermal growth factor receptor mutation detection for lung cancer: A pilot study. *Thorac. Cancer* **2016**, *7*, 428–436, doi:10.1111/1759-7714.12350.

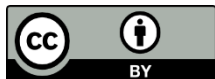

© 2020 by the authors. Licensee MDPI, Basel, Switzerland. This article is an open access article distributed under the terms and conditions of the Creative Commons Attribution (CC BY) license (<http://creativecommons.org/licenses/by/4.0/>).
